# Supplementary material for: Distinguishing the respective determining factors for spectral broadening and concentration quenching in multiple resonance type TADF emitter systems
Source: Royal Society of Chemistry journal article supplement (doi:10.1039/d2mh00511e), 2022-01-01
Supplement: d2mh00511e1.pdf [file d2mh00511e1.pdf]

**Electronic Supplementary Information (ESI)**

**Distinguishing the respective determining factors for spectral broadening and concentration quenching in multiple resonance typed TADF emitter systems**

Feng Huang,<sup>a</sup> Xiao-Chun Fan,<sup>a</sup> Ying-Chun Cheng,<sup>a</sup> Hao Wu,<sup>a</sup> Yi-Zhong Shi,<sup>a</sup> Jia Yu,<sup>a</sup> Kai Wang,<sup>a,b,\*</sup> Chun-Sing Lee<sup>c,\*</sup> and Xiao-Hong Zhang<sup>a,b,\*</sup>

<sup>a</sup>Institute of Functional Nano & Soft Materials (FUNSOM), Jiangsu Key Laboratory for Carbon-Based Functional Materials & Devices, Joint International Research Laboratory of Carbon-Based Functional Materials and Devices, Soochow University, Suzhou, Jiangsu 215123, P. R. China. Email: wkai@suda.edu.cn; xiaohong\_zhang@suda.edu.cn

<sup>b</sup>Jiangsu Key Laboratory of Advanced Negative Carbon Technologies, Soochow University, Suzhou, Jiangsu, 215123, P. R. China.

<sup>c</sup>Center of Super-Diamond and Advanced Films (COSDAF) and Department of Chemistry, City University of Hong Kong, Hong Kong SAR, P. R. China. Email: apcslee@cityu.edu.hk

# Content

|                                                |    |
|------------------------------------------------|----|
| General Information .....                      | 3  |
| Synthesis .....                                | 4  |
| Theoretical Calculations .....                 | 6  |
| Thermal and electrochemical measurements ..... | 8  |
| Photophysical Properties .....                 | 8  |
| Kinetic Analysis .....                         | 9  |
| Crystallographic Data .....                    | 10 |
| Device Characterization .....                  | 12 |
| NMR Spectra.....                               | 14 |
| References .....                               | 17 |

## General Information

**1. Materials.** All commercially available reagents were used as received unless otherwise stated. All reactions were carried out using Schlenk techniques under a nitrogen atmosphere.  $^1\text{H}$  and  $^{13}\text{C}$  NMR spectra were measured on a Bruker 400 MHz spectrometer with tetramethylsilane (TMS) as the internal standard. Mass analyses were recorded by an Autoflex MALDI-TOF mass spectrometer. Elemental analyses (EA) were conducted on a Thermo-FINNI-GAN Flash EA 1112 CHNS/O analyzer.

**2. Theoretical calculation.** The optimized structure was determined by using Gaussian 09 with a B3LYP/6-31g (d) basis set, and natural transition orbitals (NTOs) of the lowest adiabatic excited states were analyzed via a multifunctional wavefunction analyzer (Multiwfn 3.6).

**3. Thermal and electrochemical measurements.** Thermogravimetric analysis (TGA) curve was carried on a Perkin Elmer at a heating rate of  $10\text{ }^\circ\text{C}\cdot\text{min}^{-1}$  from 30 to  $700\text{ }^\circ\text{C}$  under nitrogen. The temperature of 5% weight loss was defined as the decomposition temperature ( $T_d$ ). Differential scanning calorimetry (DSC) curve was carried on a TA DSC 2010 unit at a heating rate of  $10\text{ }^\circ\text{C}\cdot\text{min}^{-1}$  from 0 to  $300\text{ }^\circ\text{C}$  under nitrogen. Cyclic voltammetry was performed on a CHI 660 instrument. Individual samples were dissolved in *N,N*-dimethylformamide and degassed with nitrogen gas for 15 minutes before the test. M tetrabutylammonium hexafluorophosphate ( $[\text{nBu}_4\text{N}]\text{PF}_6$ ) acts as the supporting electrolyte, while gold, platinum and a 3.0 M Ag/AgNO<sub>3</sub> electrodes play the role of working, counter and reference electrodes, respectively. Cyclic voltammograms (CVs) were obtained at a scan rate of  $0.05\text{ V}\cdot\text{s}^{-1}$  with standardized against ferrocene/ferrocenium.

**4. Measurement of absorption and emission characteristics.** UV–Vis absorption spectra were recorded on a Hitachi U-3900 spectrophotometer. PL spectra were recorded on a Hitachi F-4600 fluorescence spectrophotometer with default collection intervals. Transient fluorescence decays were measured with a Quantaaurus-Tau fluorescence lifetime spectrometer (C11367-32, Hamamatsu Photonics) with an excitation wavelength of 373 nm and pulse width of 100 ps. The absolute PL quantum yields were recorded on a Hamamatsu Quantaaurus-QY quantum yield spectrometer (C13534-11).

**5. Single-Crystal Structure.** Diffraction data were collected on a Rigaku R-AXIS-RAPID diffractometer using  $\omega$ -scan mode with graphite-monochromator MoK $\alpha$  radiation. The structure determination was solved with direct methods using the SHELXTL programs and refined with full-matrix least squares on  $F^2$ . All crystallographic information in CIF format have been deposited at the Cambridge Crystallographic Center (CCDC) under deposition number 2153530 for TCzBN-DPF and 2161232 for TCzBN-TMPh via [www.ccdc.cam.ac.uk/data\\_request/cif](http://www.ccdc.cam.ac.uk/data_request/cif).

**6. Device fabrication and measurement of EL characteristics.** Before device fabrication, the ITO glass substrates were precleaned carefully. Then, the sample was transferred to the deposition system. The devices were prepared in vacuum at a pressure of  $4\times 10^{-5}$  Torr. The hole transporting material TAPC and

TCTA, electron-transporting material TmPyPb, and host material SF<sub>3</sub>TRZ were thermally evaporated at a rate of 1.0 Å s<sup>-1</sup>. After organic film deposition, 1 nm of LiF and 100 nm of aluminum were thermally evaporated onto the organic surface. The electrical characteristics, electroluminescence spectra, and luminance of the devices were characterized with a Spectra Scan PR 655 PHOTOMETER and a KEITHLEY 2400 Source Meter constant current source at room temperature.

## Synthesis

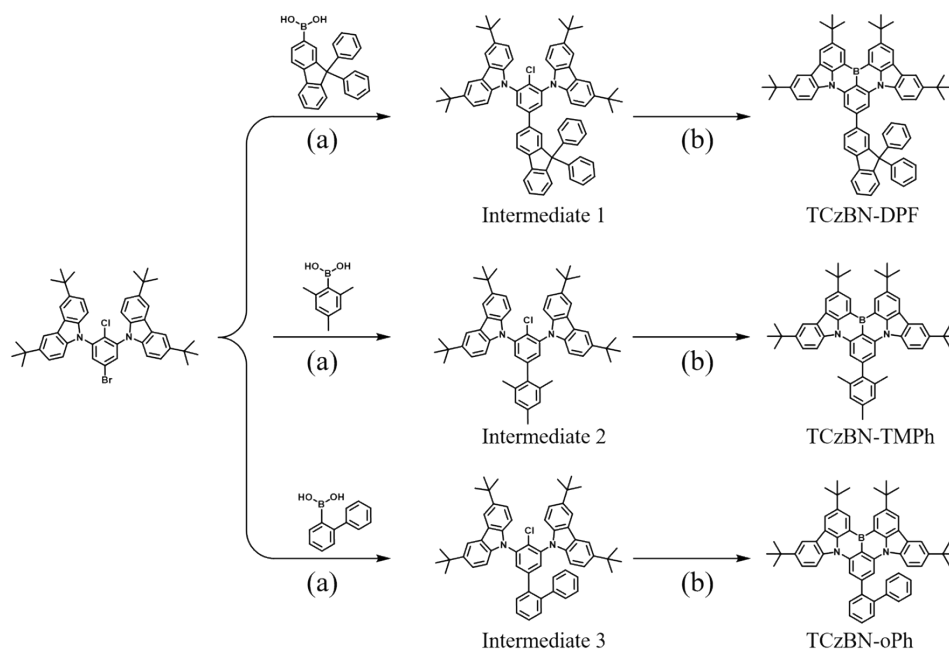

**Scheme S1.** Synthetic routes for DtBuCzB derivatives. (a) Pd(PPh<sub>3</sub>)<sub>4</sub>, K<sub>2</sub>CO<sub>3</sub>, Dioxane; (b) 1. t-BuLi, t-BuPh, -50 °C, then 60 °C, 2 h; 2. BBr<sub>3</sub>, -40 °C, 1 h, then RT, 1 h; 3. NEt(i-Pr)<sub>2</sub>, 0 °C, then 120 °C, 5 h.

**Synthesis of DtBuCzB:** The synthesis process was performed according to the reported literature.<sup>1</sup>  
**Synthesis of 9,9'-(2-chloro-5-(9,9-diphenyl-9H-fluoren-2-yl)-1,3-phenylene)bis(3,6-di-tert-butyl-9H-carbazole) (Intermediate 1):** A mixture of 9,9'-(5-bromo-2-chloro-1,3-phenylene)bis(3,6-di-tert-butyl-9H-carbazole) (3.73 g, 5.0 mmol), (9,9-diphenyl-9H-fluoren-2-yl)boronic acid (2.71 g, 7.5 mmol), Pd(PPh<sub>3</sub>)<sub>4</sub> (115.56 mg, 0.1 mmol), 2.0 M potassium carbonate aqueous solution (5 mL, 10 mmol) and 50 mL dioxane were added to a 250 mL two-neck flask and refluxed at 110 °C under N<sub>2</sub> protection for 12 hours. After the reaction was cooled to room temperature, the mixture was extracted with dichloromethane and water three times to collect the organic layer. Then, the collection was dried with MgSO<sub>4</sub> and concentrated with rotary evaporation. The residue was purified via column chromatography eluting with petroleum ether: dichloromethane (10:1) to obtain a white solid (4.10 g, yield: 83%).

**Synthesis of 9,9'-(4-chloro-2',4',6'-trimethyl-[1,1'-biphenyl]-3,5-diyl)bis(3,6-di-tert-butyl-9H-carbazole) (Intermediate 2):** Intermediate 2 was synthesized according to the same procedure as for

intermediate 1 by using 2,4,6-trimethylphenylboronic acid (1.23 g, 7.5 mmol) instead (9,9-diphenyl-9H-fluoren-2-yl)boronic acid. White solid (3.49 g, yield: 89%).

Synthesis of 9,9'-(4-chloro-[1,1':2',1''-terphenyl]-3,5-diyl)bis(3,6-di-tert-butyl-9H-carbazole) (**Intermediate 3**): Intermediate 3 was synthesized according to the same procedure as for intermediate 1 by using 2-diphenylboronic acid (1.48 g, 7.5 mmol) instead (9,9-diphenyl-9H-fluoren-2-yl)boronic acid. White solid (3.44 g, yield: 84%).

Synthesis of **TCzBN-DPF**: Intermediate 1 (4.92 g, 5.0 mmol) and tert-butylbenzene (60 mL) were added to a dried 250 mL two-neck flask in a nitrogen atmosphere. After stirring for dissolution, a solution of tert-butyllithium in pentane (6.2 mL, 1.60 M, 10.0 mmol) was added slowly to the solution at -50 °C. Then, the mixture was heated to 60 °C and stirred for 2 hours. After the removal of pentane in vacuo, boron tribromide (1.0 mL, 10.0 mmol) was injected slowly into the reaction at -50 °C. The reaction was warmed to room temperature, and the mixture was stirred for 1 hour. Then, N,N-diisopropylethylamine (1.7 mL, 10.0 mmol) was added at 0 °C, and the reaction was stirred at 130 °C for another 5 hours. After the reaction was cooled to room temperature, a phosphorus buffer solution (pH 6, 10 mL) was added, and the aqueous layer was separated and extracted with dichloromethane and water. The collected organic layer was dried with MgSO<sub>4</sub> and concentrated in vacuo to give the crude product. Furthermore, the crude product was purified via column chromatography eluting with petroleum ether: dichloromethane (10:1) to obtain a yellow solid (1.62 g, yield: 34%). <sup>1</sup>H NMR (400 MHz, Chloroform-*d*) δ 9.15 (d, *J* = 1.9 Hz, 2H), 8.53 – 8.48 (m, 4H), 8.36 (d, *J* = 8.8 Hz, 2H), 8.30 (d, *J* = 2.0 Hz, 2H), 8.07 – 7.91 (m, 4H), 7.66 (dd, *J* = 8.8, 2.1 Hz, 2H), 7.57 (dd, *J* = 7.6, 1.0 Hz, 1H), 7.48 (td, *J* = 7.4, 1.1 Hz, 1H), 7.43 – 7.30 (m, 11H), 1.70 (s, 18H), 1.58 (s, 18H). <sup>13</sup>C NMR (101 MHz, CDCl<sub>3</sub>) δ 152.28, 151.48, 146.04, 145.30, 144.69, 141.75, 141.35, 140.40, 139.84, 138.31, 129.83, 128.43, 128.31, 128.10, 127.75, 127.35, 127.17, 126.77, 126.40, 126.02, 124.46, 123.62, 120.80, 120.65, 120.55, 117.30, 114.19, 107.08, 65.72, 35.18, 34.80, 32.20, 31.85. MALDI-TOF MS (mass *m/z*): 956.5241 [M]<sup>+</sup>; calcd for C<sub>71</sub>H<sub>65</sub>BN<sub>2</sub> 956.9584. Anal. Calcd (%) for C, 89.10; H, 6.85; B, 1.13; N, 2.93; Found: C, 88.96; H, 6.93; N, 2.86.

Synthesis of **TCzBN-TMPH**: TCzBN-TMPH was synthesized according to the same procedure as for TCzBN-DPF by using Intermediate 3 (3.93 g, 5.0 mmol) instead of Intermediate 1 (4.92 g, 5.0 mmol). TCzBN-oPh (1.32 g, yield: 35%) was obtained as a yellow solid. <sup>1</sup>H NMR (400 MHz, Chloroform-*d*) δ 9.19 (d, *J* = 1.7 Hz, 2H), 8.51 (d, *J* = 1.7 Hz, 2H), 8.34 – 8.27 (m, 4H), 8.17 (s, 2H), 7.60 (dd, *J* = 8.8, 2.0 Hz, 2H), 7.14 (s, 2H), 2.48 (s, 3H), 2.26 (s, 6H), 1.72 (s, 18H), 1.54 (s, 18H). <sup>13</sup>C NMR (101 MHz, CDCl<sub>3</sub>) δ 146.51, 145.34, 144.70, 144.50, 141.70, 139.57, 138.28, 137.22, 136.12, 129.85, 128.31, 127.03, 124.35, 123.64, 120.65, 117.19, 114.26, 109.05, 35.20, 34.77, 32.22, 31.81, 21.19, 20.89. MALDI-TOF MS (mass *m/z*): 758.8832 [M]<sup>+</sup>; calcd for C<sub>55</sub>H<sub>59</sub>BN<sub>2</sub> 758.4771. Anal. Calcd (%) for C, 87.05; H, 7.84; B, 1.42; N, 3.69; Found: C, 87.15; H, 7.75; N, 3.57.

Synthesis of **TCzBN-oPh**: TCzBN-oPh was synthesized according to the same procedure as for TCzBN-DPF by using Intermediate 2 (4.10 g, 5.0 mmol) instead of Intermediate 1 (4.92 g, 5.0 mmol).

TCzBN-oPh (1.51 g, yield: 38%) was obtained as a yellow solid.  $^1\text{H}$  NMR (400 MHz, Chloroform-*d*)  $\delta$  9.13 (d,  $J = 1.7$  Hz, 2H), 8.47 (d,  $J = 1.7$  Hz, 2H), 8.25 (d,  $J = 1.9$  Hz, 2H), 8.17 (s, 2H), 7.80 – 7.77 (m, 1H), 7.73 – 7.67 (m, 3H), 7.64 – 7.50 (m, 6H), 7.36 (t,  $J = 7.7$  Hz, 2H), 7.21 (t,  $J = 7.4$  Hz, 1H), 1.69 (s, 18H), 1.55 (s, 18H).  $^{13}\text{C}$  NMR (101 MHz,  $\text{CDCl}_3$ )  $\delta$  146.28, 145.19, 144.60, 143.79, 141.65, 141.41, 140.83, 138.18, 131.31, 131.19, 130.23, 129.71, 128.34, 127.96, 127.19, 126.84, 124.15, 123.60, 120.59, 117.07, 114.07, 110.31, 35.17, 34.76, 32.20, 32.00, 31.83. MALDI-TOF MS (mass  $m/z$ ): 792.8493  $[\text{M}]^+$ ; calcd for  $\text{C}_{58}\text{H}_{57}\text{BN}_2$  792.4615. Anal. Calcd (%) for C, 87.86; H, 7.25; B, 1.36; N, 3.53; Found: C, 87.77; H, 7.36; N, 3.44.

## Theoretical Calculations

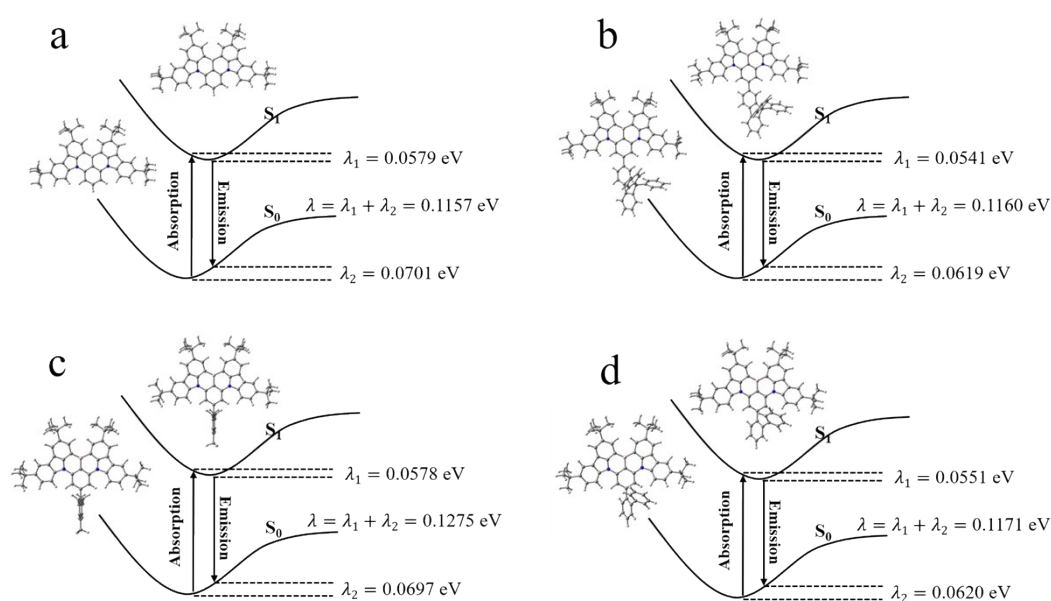

**Figure S1.** Reorganization energies with optimized S<sub>0</sub> and S<sub>1</sub> geometries and single point energies of (a) DtBuCzB, (b) TCzBN-DPF, (c) TCzBN-TMPH and (d) TCzBN-oPh.

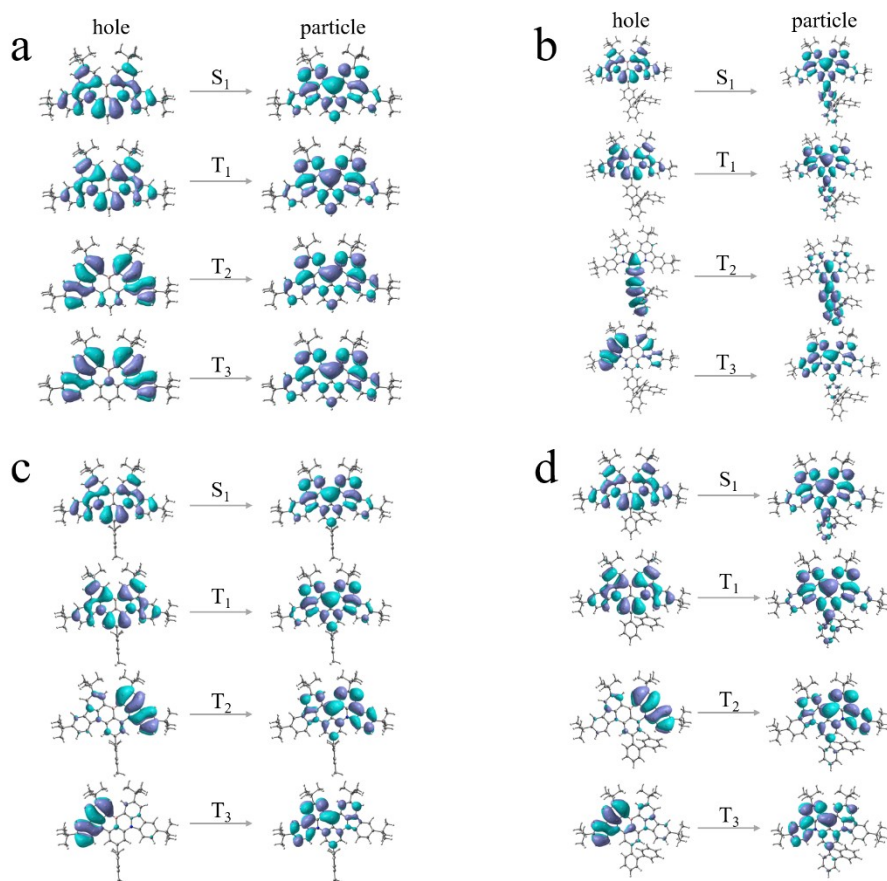

**Figure S2.** Calculated natural transition orbital (NTO) distributions of (a) DtBuCzB, (b) TCzBN-DPF, (c) TCzBN-TMPH and (d) TCzBN-oPh in their excited states.

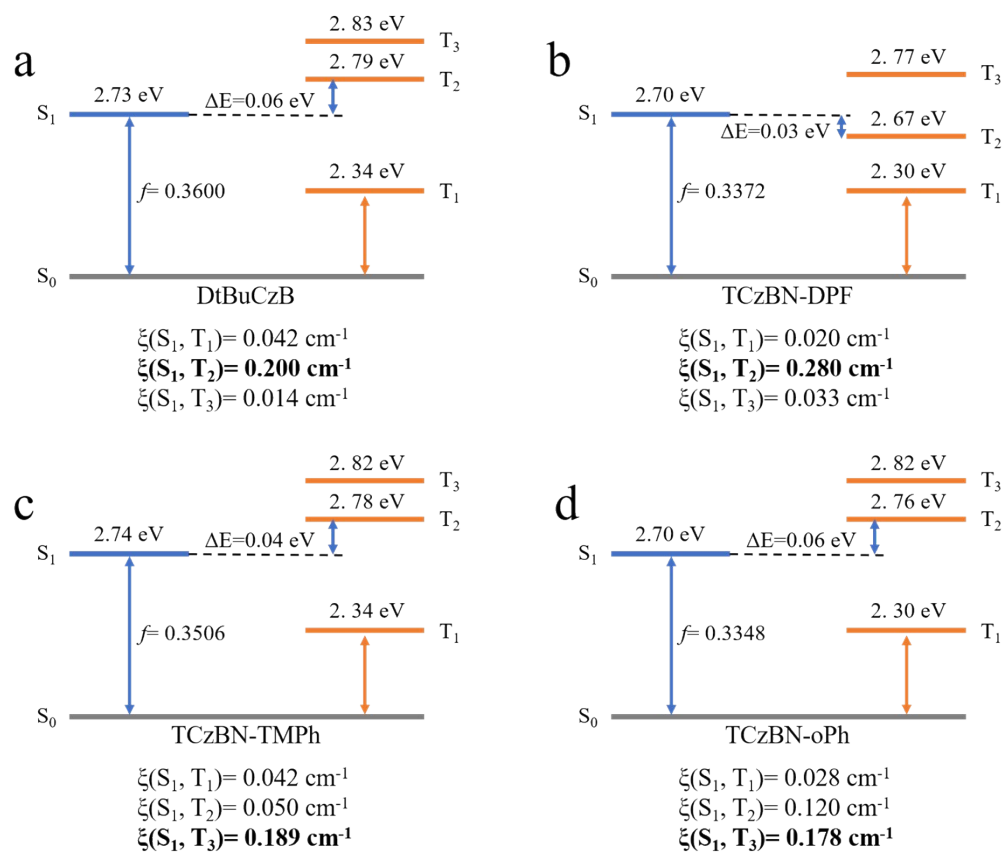

**Figure S3.** Theoretically estimated energy diagrams of (a) DtBuCzB, (b) TCzBN-DPF, (c) TCzBN-TMPH and (d) TCzBN-oPh and their SOC matrix elements between the T<sub>n</sub> (n=1, 2, 3) and S<sub>1</sub> states.

## Thermal and electrochemical measurements

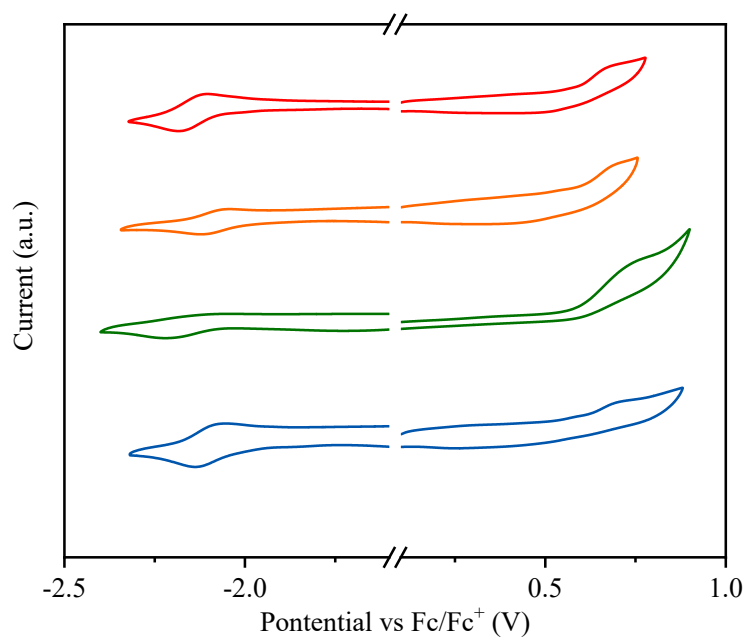

**Figure S4.** Cyclic voltammogram (CV) curves of DtBuCzB (red), TCzBN-DPF (orange), TCzBN-TMPh (green) and TCzBN-oPh (blue) in degassed DMF solutions.

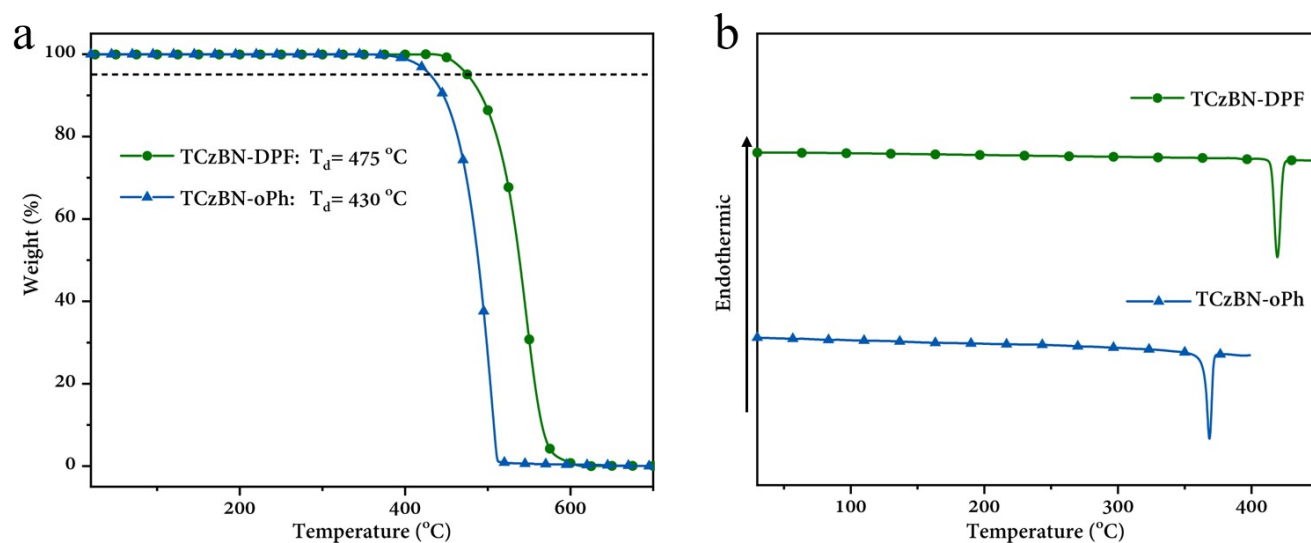

**Figure S5.** TGA traces (a) and DSC traces (b) of TCzBN-DPF and TCzBN-oPh.

## Photophysical Properties

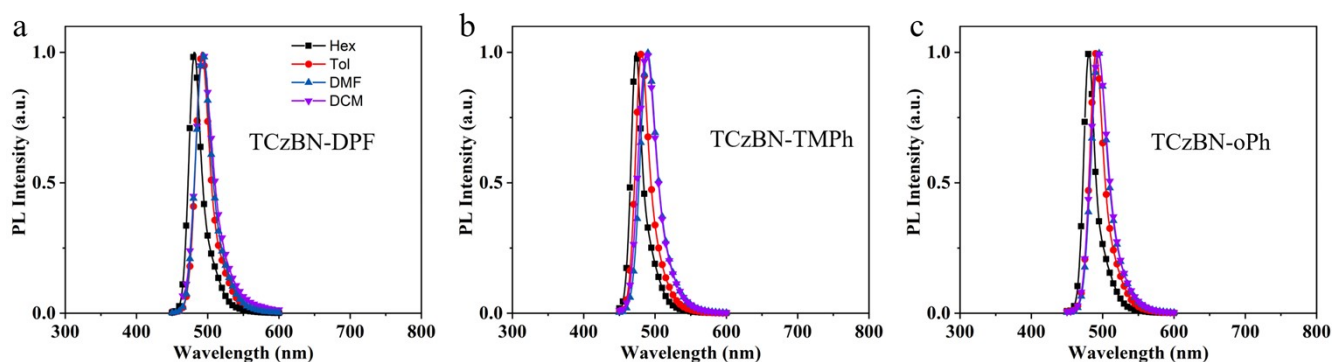

**Figure S6.** Fluorescence spectra of (a) TCzBN-DPF, (b) TCzBN-TMPh and (c) TCzBN-oPh in different solvents.



**Table S1.** Summary of the fluorescence and phosphorescence wavelengths and corresponding energy levels of the MR emitters at 77 K.

| Emitters   | wt [%] | FL [nm] | PL [nm] | S <sub>1</sub> [eV] | T <sub>1</sub> [eV] | ΔE <sub>ST</sub> [eV] |
|------------|--------|---------|---------|---------------------|---------------------|-----------------------|
| DtBuCzB    | 1      | 493     | 514     | 2.51                | 2.41                | 0.10                  |
|            | 5      | 498     | 519     | 2.49                | 2.39                | 0.10                  |
|            | 10     | 503     | 525     | 2.47                | 2.36                | 0.11                  |
|            | 20     | 507     | 534     | 2.44                | 2.32                | 0.12                  |
| TCzBN-DPF  | 1      | 499     | 520     | 2.48                | 2.38                | 0.10                  |
|            | 5      | 503     | 524     | 2.46                | 2.36                | 0.10                  |
|            | 10     | 506     | 528     | 2.45                | 2.34                | 0.11                  |
|            | 20     | 508     | 536     | 2.44                | 2.31                | 0.13                  |
| TCzBN-TMPH | 1      | 491     | 511     | 2.52                | 2.42                | 0.10                  |
|            | 5      | 494     | 517     | 2.51                | 2.40                | 0.11                  |
|            | 10     | 495     | 520     | 2.50                | 2.38                | 0.12                  |
|            | 20     | 496     | 526     | 2.50                | 2.36                | 0.14                  |
| TCzBN-oPh  | 1      | 495     | 516     | 2.50                | 2.40                | 0.10                  |
|            | 5      | 500     | 520     | 2.48                | 2.38                | 0.10                  |
|            | 10     | 502     | 526     | 2.47                | 2.35                | 0.12                  |
|            | 20     | 505     | 533     | 2.45                | 2.32                | 0.13                  |

## Kinetic Analysis

The key kinetic parameters of the MR emitters are estimated according to the following equations, and the key kinetic parameters are summarized in Table S2.

$$PLQY = \varphi_p + \varphi_d$$

$$k_p = \frac{1}{\tau_p}$$

$$k_d = \frac{1}{\tau_d}$$

$$k_r^s = k_p \varphi_p$$

$$k_{ISC} = k_p (1 - \varphi_p)$$

$$k_{RISC} = \frac{k_p k_d \varphi_d}{k_{ISC} \varphi_p}$$

$$k_{CQ} = \frac{1}{2} (k_p + k_d - 2k_{RISC} - \sqrt{(k_p - k_d)^2 - 4k_{ISC}k_{RISC}})$$

where  $\varphi_p$  and  $\varphi_d$  are the prompt and delayed fluorescence quantum efficiencies, respectively;

$k_r^s$  are the rate constants of the singlet radiative transition;

$k_p$ ,  $k_d$ ,  $k_{ISC}$  and  $k_{RISC}$  are the rate constants of prompt fluorescence, delayed fluorescence decay, ISC and RISC processes, respectively;

$k_{CQ}$  are the rate constants of the concentration quenching process.<sup>2-4</sup>

**Table S2.** Calculated dynamic parameters of MR emitters in SF<sub>3</sub>TRZ films with different doping concentrations from 1 wt% to 20 wt%.

| Emitters   | wt (%) | PLQY (%) | $\phi_p$ (%) | $\phi_d$ (%) | $\tau_p$ [ns] | $\tau_d$ [ $\mu$ s] | $k_p$ ( $10^8 s^{-1}$ ) | $k_r^s$ ( $10^8 s^{-1}$ ) | $k_d$ ( $10^3 s^{-1}$ ) | $k_{ISC}$ ( $10^8 s^{-1}$ ) | $k_{RISC}$ ( $10^4 s^{-1}$ ) | $k_{CQ}$ ( $10^3 s^{-1}$ ) |
|------------|--------|----------|--------------|--------------|---------------|---------------------|-------------------------|---------------------------|-------------------------|-----------------------------|------------------------------|----------------------------|
| DtBuCzB    | 1      | 92.9     | 50.2         | 42.7         | 6.1           | 127                 | 1.65                    | 0.83                      | 7.86                    | 0.82                        | 1.34                         | 1.12                       |
|            | 5      | 85.9     | 59.7         | 26.2         | 4.4           | 123                 | 2.27                    | 1.36                      | 8.09                    | 0.91                        | 0.88                         | 2.84                       |
|            | 10     | 77.0     | 52.3         | 24.7         | 3.9           | 118                 | 2.59                    | 1.36                      | 8.42                    | 1.24                        | 0.83                         | 4.06                       |
|            | 20     | 69.5     | 57.6         | 11.9         | 3.7           | 96                  | 2.69                    | 1.55                      | 10.4                    | 1.14                        | 0.51                         | 7.45                       |
| TCzBN-DPF  | 1      | 96.9     | 43.8         | 53.1         | 5.7           | 55                  | 1.82                    | 0.77                      | 18.2                    | 0.99                        | 3.92                         | 1.01                       |
|            | 5      | 96.1     | 47.7         | 48.4         | 5.3           | 56                  | 1.78                    | 0.90                      | 17.8                    | 0.98                        | 3.45                         | 1.33                       |
|            | 10     | 95.7     | 53.6         | 42.1         | 5.7           | 56                  | 1.78                    | 0.93                      | 17.8                    | 0.81                        | 3.01                         | 1.65                       |
|            | 20     | 92.1     | 59.0         | 33.1         | 4.4           | 55                  | 1.81                    | 1.33                      | 18.1                    | 0.92                        | 2.48                         | 3.49                       |
| TCzBN-TMPH | 1      | 94       | 46.1         | 47.9         | 5.8           | 105                 | 1.73                    | 0.80                      | 9.48                    | 0.93                        | 1.83                         | 1.06                       |
|            | 5      | 89.8     | 50.0         | 39.8         | 4.6           | 97                  | 2.18                    | 1.09                      | 10.3                    | 1.09                        | 1.63                         | 2.09                       |
|            | 10     | 82.4     | 53.0         | 29.4         | 3.9           | 92                  | 2.57                    | 1.37                      | 10.8                    | 1.21                        | 1.27                         | 4.05                       |
|            | 20     | 74.0     | 59.3         | 14.7         | 2.5           | 92                  | 4.07                    | 2.41                      | 10.8                    | 1.66                        | 0.66                         | 6.87                       |
| TCzBN-oPh  | 1      | 96.1     | 50.6         | 45.5         | 5.9           | 112                 | 1.71                    | 0.86                      | 8.91                    | 0.84                        | 1.62                         | 0.71                       |
|            | 5      | 95.7     | 58.4         | 37.3         | 5.2           | 111                 | 1.92                    | 1.12                      | 8.99                    | 0.80                        | 1.38                         | 0.93                       |
|            | 10     | 92.1     | 66.6         | 25.5         | 4.0           | 104                 | 2.48                    | 1.65                      | 9.60                    | 0.83                        | 1.10                         | 2.27                       |
|            | 20     | 86.0     | 61.6         | 24.4         | 3.8           | 102                 | 2.64                    | 1.63                      | 9.78                    | 1.01                        | 1.01                         | 3.57                       |

**Table S3.** Calculated intermolecular distance of the MR emitters in doped films.

|            | Intermolecular distance (nm) <sup>a</sup> |       |        |        |
|------------|-------------------------------------------|-------|--------|--------|
|            | 1 wt%                                     | 5 wt% | 10 wt% | 20 wt% |
| DtBuCzB    | 4.34                                      | 2.54  | 2.02   | 1.60   |
| TCzBN-DPF  | 4.96                                      | 2.90  | 2.30   | 1.83   |
| TCzBN-TMPH | 4.59                                      | 2.69  | 2.13   | 1.69   |
| TCzBN-oPh  | 4.66                                      | 2.73  | 2.16   | 1.72   |

<sup>a</sup>The intermolecular distance (R) is calculated via  $R = [\rho \times \beta \times \frac{N_A}{M_g}]^{-\frac{1}{3}}$ , where  $\rho$  is the film density ( $\approx 1.3 g cm^{-3}$ ),  $\beta$  is the dopant concentration in the film (wt%),  $N_A$  is the Avogadro number and  $M_g$  is the dopant molecular weight.<sup>5</sup>

## Crystallographic Data

**Table S4.** Crystal data and structure refinement for TCzBN-DPF and TCzBN-TMPH.

|                        |                    |
|------------------------|--------------------|
| Empirical formula      | $C_{71}H_{65}BN_2$ |
| Formula weight         | 957.06             |
| Temperature/K          | 150                |
| Crystal system         | triclinic          |
| Space group            | P -1               |
| Hall group             | -P 1               |
| a/ $\text{\AA}$        | 15.3343 (7)        |
| b/ $\text{\AA}$        | 16.0574 (7)        |
| c/ $\text{\AA}$        | 17.7726 (7)        |
| $\alpha/^\circ$        | 93.9950 (10)       |
| $\beta/^\circ$         | 113.8040 (10)      |
| $\gamma/^\circ$        | 110.9540 (10)      |
| Volume/ $\text{\AA}^3$ | 3619.9 (3)         |
| Z                      | 2                  |

|                              |                                                                    |
|------------------------------|--------------------------------------------------------------------|
| Density                      | 0.878                                                              |
| $\mu/\text{mm}^{-1}$         | 0.050                                                              |
| F(000)                       | 1020                                                               |
| $\theta$ range/ $\text{\AA}$ | 2.304-26.166                                                       |
| Crystal size/ $\text{mm}^3$  | 0.15 $\times$ 0.08 $\times$ 0.05                                   |
| Radiation                    | Moka ( $\lambda = 0.71073$ )                                       |
| Index ranges                 | $-19 \leq h \leq 18$ , $-18 \leq k \leq 20$ , $-22 \leq l \leq 22$ |
| Reflections collected        | 41304                                                              |
| R (reflections)              | 0.0671 (7153)                                                      |
| wR2 (reflections)            | 0.1981 (14691)                                                     |

---

|                              |                                                                    |
|------------------------------|--------------------------------------------------------------------|
| Empirical formula            | $\text{C}_{55}\text{H}_{59}\text{BN}_2$                            |
| Formula weight               | 758.85                                                             |
| Temperature/K                | 150                                                                |
| Crystal system               | monoclinic                                                         |
| Space group                  | P 1 21/c 1                                                         |
| Hall group                   | -p 2ybc                                                            |
| a/ $\text{\AA}$              | 12.0821 (7)                                                        |
| b/ $\text{\AA}$              | 31.477 (2)                                                         |
| c/ $\text{\AA}$              | 11.6968 (8)                                                        |
| $\alpha/^\circ$              | 90                                                                 |
| $\beta/^\circ$               | 98.973 (2)                                                         |
| $\gamma/^\circ$              | 90                                                                 |
| Volume/ $\text{\AA}^3$       | 4397.0 (5)                                                         |
| Z                            | 4                                                                  |
| Density                      | 1.147                                                              |
| $\mu/\text{mm}^{-1}$         | 0.065                                                              |
| F(000)                       | 1632.0                                                             |
| $\theta$ range/ $\text{\AA}$ | 2.898-26.363                                                       |
| Crystal size/ $\text{mm}^3$  | 0.15 $\times$ 0.08 $\times$ 0.05                                   |
| Radiation                    | Moka ( $\lambda = 0.71073$ )                                       |
| Index ranges                 | $-15 \leq h \leq 13$ , $-39 \leq k \leq 34$ , $-13 \leq l \leq 14$ |
| Reflections collected        | 27185                                                              |
| R(reflections)               | 0.0692 (4353)                                                      |
| wR2(reflections)             | 0.1806 (8735)                                                      |

---

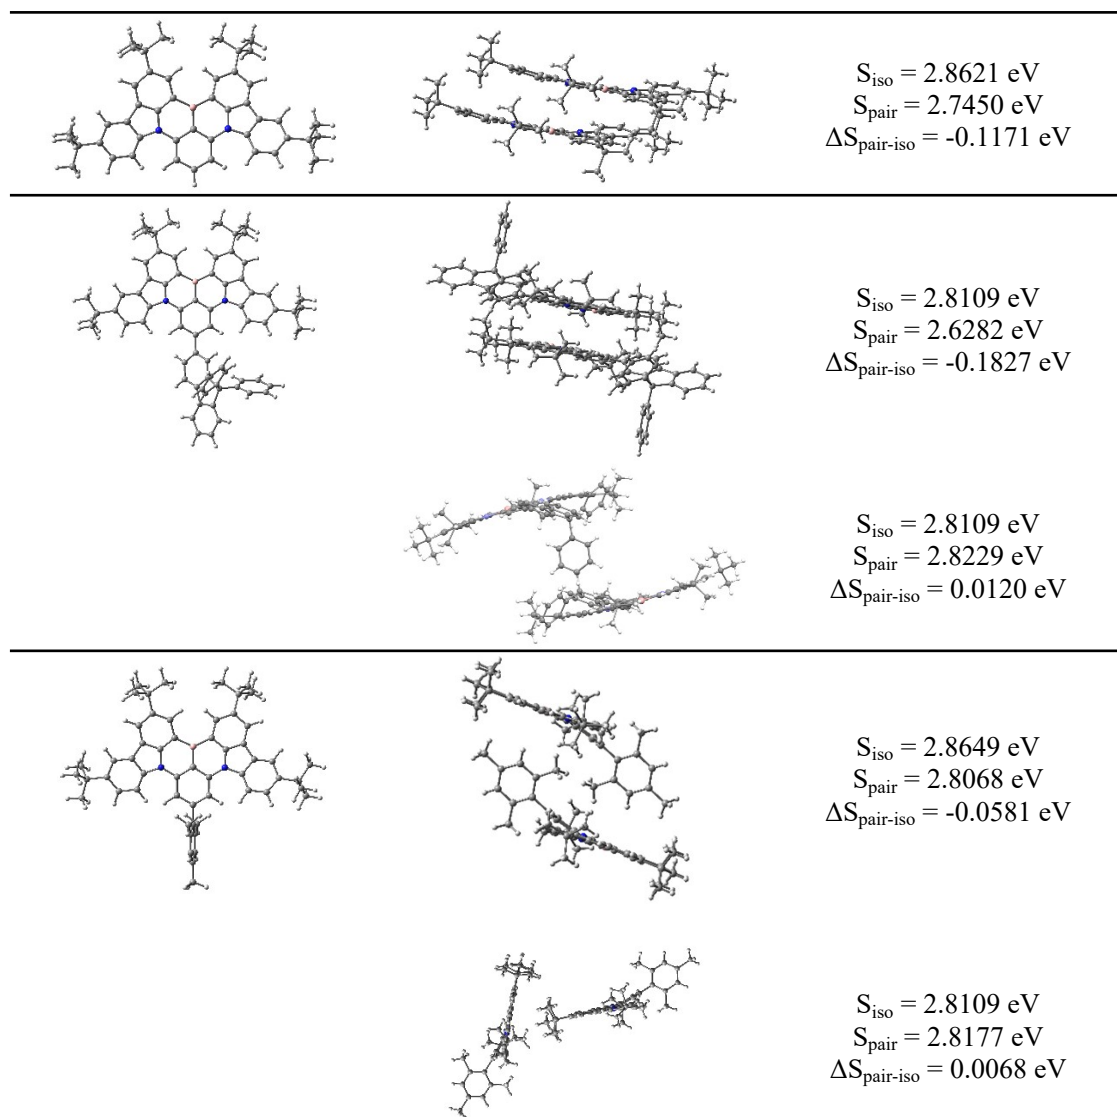

**Figure S7.** Calculation of the  $S_1$  energy level of isolated molecules and molecule pairs for DtBuCzB, TCzBN-DPF and TCzBN-TMPH according to their stacking modes in crystal.

## Device Characterization

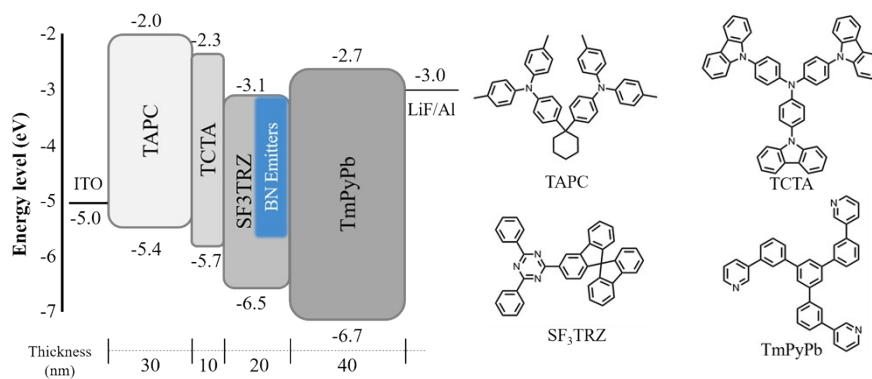

**Figure S8.** Device architecture for MR BN system emitters with energy level alignment and materials utilized in device fabrication.

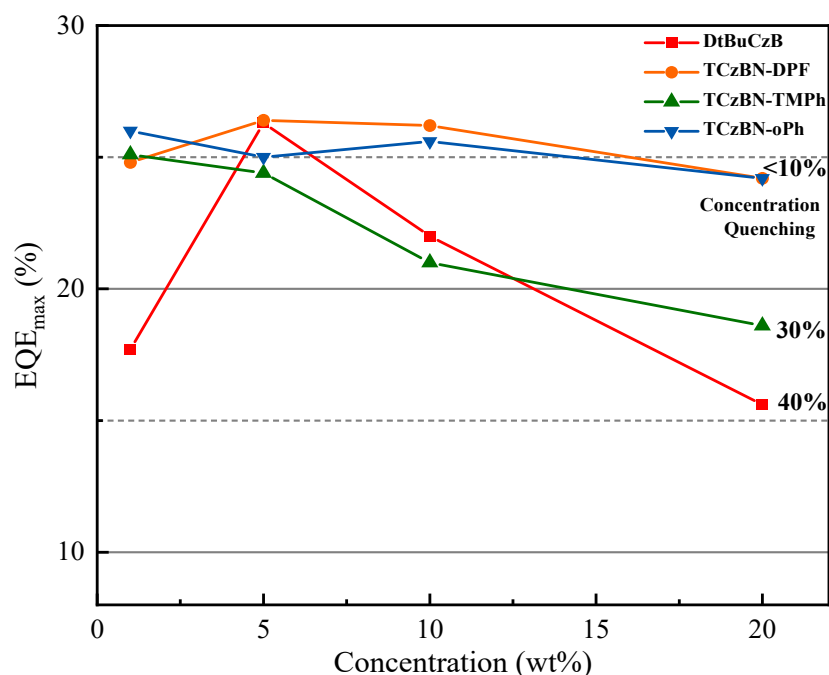

**Figure S9.** Maximum external quantum efficiency-concentration relationship of the OLEDs based on DtBuCzB (red), TCzBN-DPF (orange), TCzBN-oPh (green) and TCzBN-TMPh (blue).

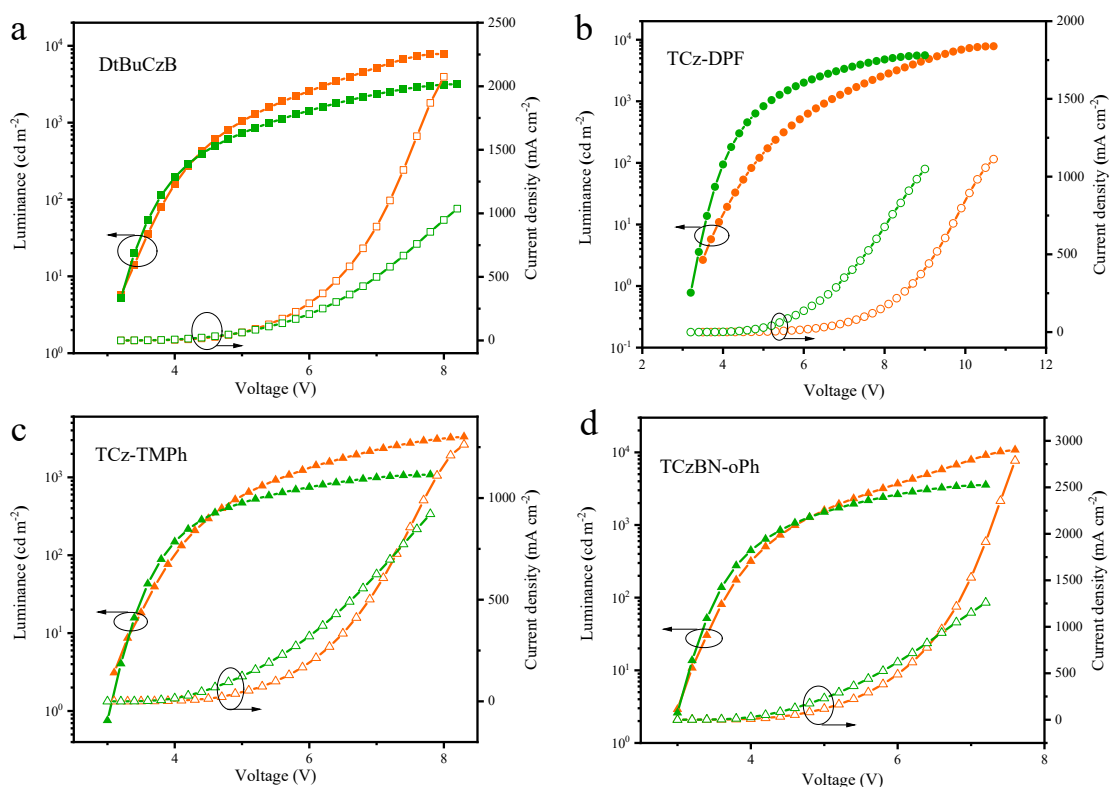

**Figure S10.** Luminance-voltage-current density characteristics of the OLEDs based on (a) DtBuCzB, (b) TCzBN-DPF, (c) TCzBN-TMPh and (d) TCzBN-oPh at 5 wt% (orange line) and 20 wt% (green line) doping concentrations.

**Table S5.** Summary of the OLED performances based on these MR emitters.

| Emitters  | Concentration [wt%] | $\lambda_{\max}^a$ [nm] | FWHM <sup>b</sup> [nm/eV] | EQE <sup>c</sup> [%] | CIE <sup>d</sup> (x, y) |
|-----------|---------------------|-------------------------|---------------------------|----------------------|-------------------------|
| DtBuCzB   | 1                   | 488                     | 28/0.145                  | 17.7/16.8/8.6        | 0.09, 0.37              |
|           | 5                   | 490                     | 31/0.158                  | 26.3/21.1/9.0        | 0.10, 0.45              |
|           | 10                  | 492                     | 37/0.186                  | 22.0/16.4/3.9        | 0.12, 0.50              |
|           | 20                  | 493                     | 43/0.212                  | 15.6/12.2/3.4        | 0.14, 0.54              |
| TCzBN-DPF | 1                   | 496                     | 28/0.140                  | 24.8/19.1/11.3       | 0.09, 0.53              |

|            |    |     |          |                |            |
|------------|----|-----|----------|----------------|------------|
|            | 5  | 498 | 31/0.156 | 26.4/22.8/12.0 | 0.10, 0.56 |
|            | 10 | 500 | 32/0.158 | 26.2/23.7/12.9 | 0.12, 0.58 |
|            | 20 | 501 | 36/0.175 | 24.2/19.2/9.2  | 0.17, 0.60 |
| TCzBN-TMPH | 1  | 488 | 27/0.140 | 25.1/18.4/6.5  | 0.11, 0.38 |
|            | 5  | 488 | 27/0.139 | 24.4/18.3/5.2  | 0.09, 0.37 |
|            | 10 | 488 | 27/0.139 | 21.0/17.8/4.7  | 0.10, 0.39 |
|            | 20 | 488 | 27/0.139 | 18.6/6.9/0.8   | 0.10, 0.39 |
| TCzBN-oPh  | 1  | 492 | 28/0.142 | 26.0/22.9/10.4 | 0.09, 0.46 |
|            | 5  | 495 | 29/0.146 | 25.0/20.8/8.4  | 0.09, 0.51 |
|            | 10 | 496 | 29/0.145 | 25.6/21.2/6.4  | 0.10, 0.52 |
|            | 20 | 496 | 31/0.154 | 24.2/14.7/3.7  | 0.11, 0.54 |

<sup>a</sup>Maximum electroluminescence wavelength. <sup>b</sup>Full width at half maximum of electroluminescence. <sup>c</sup>Maximum efficiency/efficiency at 100 cd/m<sup>2</sup>/efficiency at 1000 cd/m<sup>2</sup>. <sup>d</sup>Recorded at 10 cd/m<sup>2</sup>.

## NMR Spectra

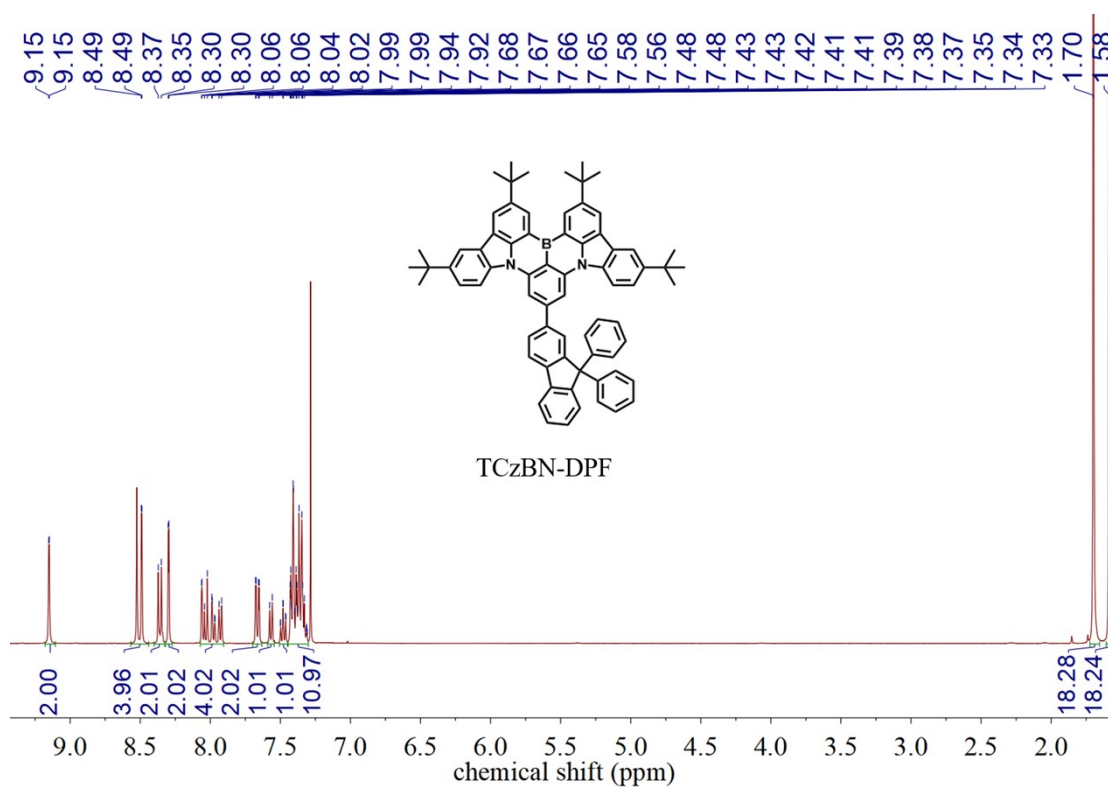

**Figure S11.** <sup>1</sup>H NMR spectrum of TCzBN-DPF in Chloroform-*d*.

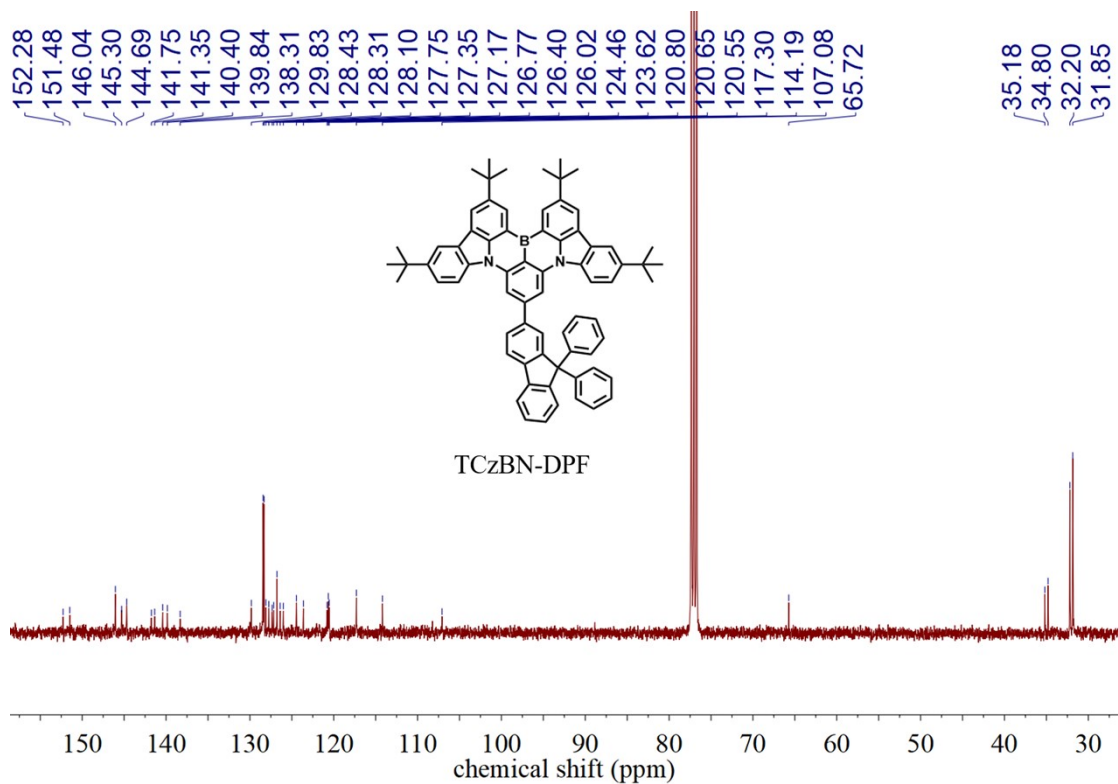

**Figure S12.** <sup>13</sup>C NMR spectrum of TCzBN-DPF in Chloroform-*d*.

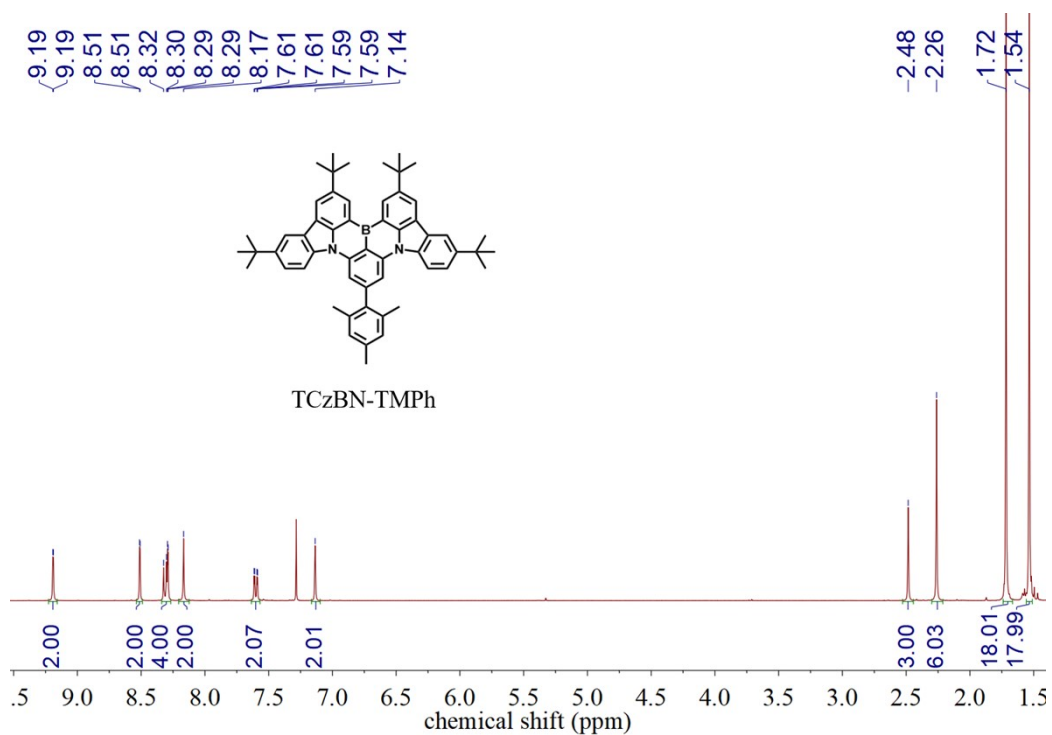

**Figure S13.** <sup>1</sup>H NMR spectrum of TCzBN-TMPh in Chloroform-*d*.

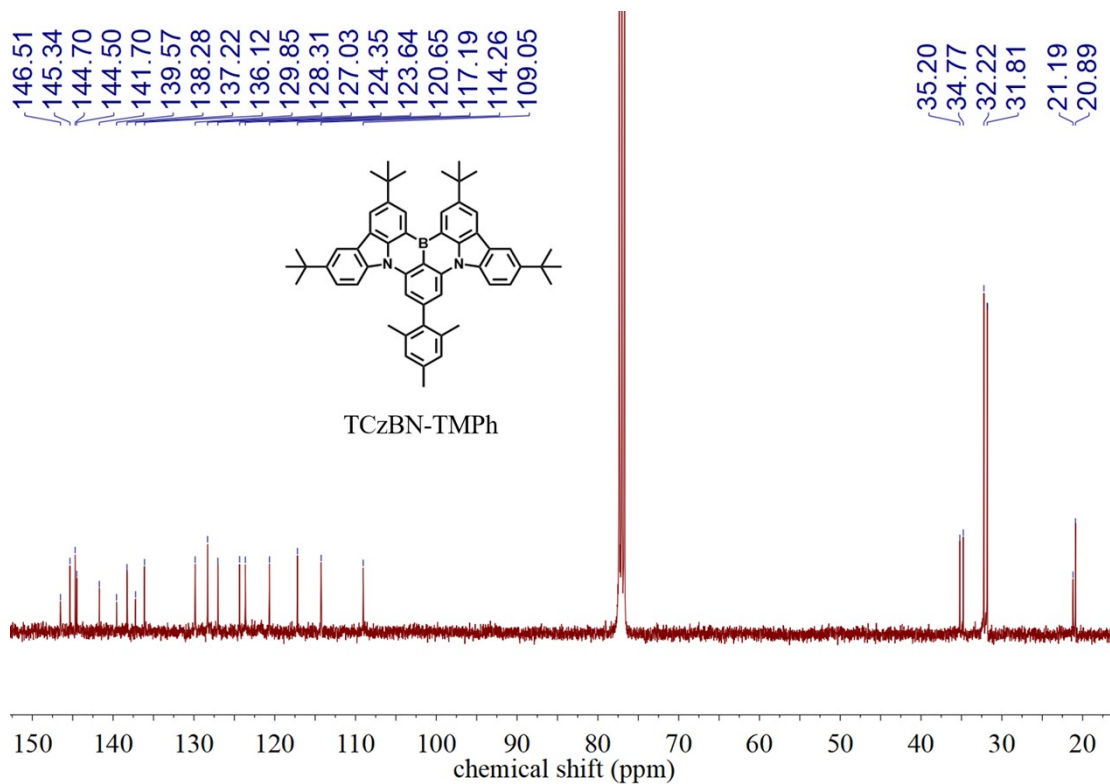

**Figure S14.** <sup>13</sup>C NMR spectrum of TCzBN-TMPH in Chloroform-*d*.

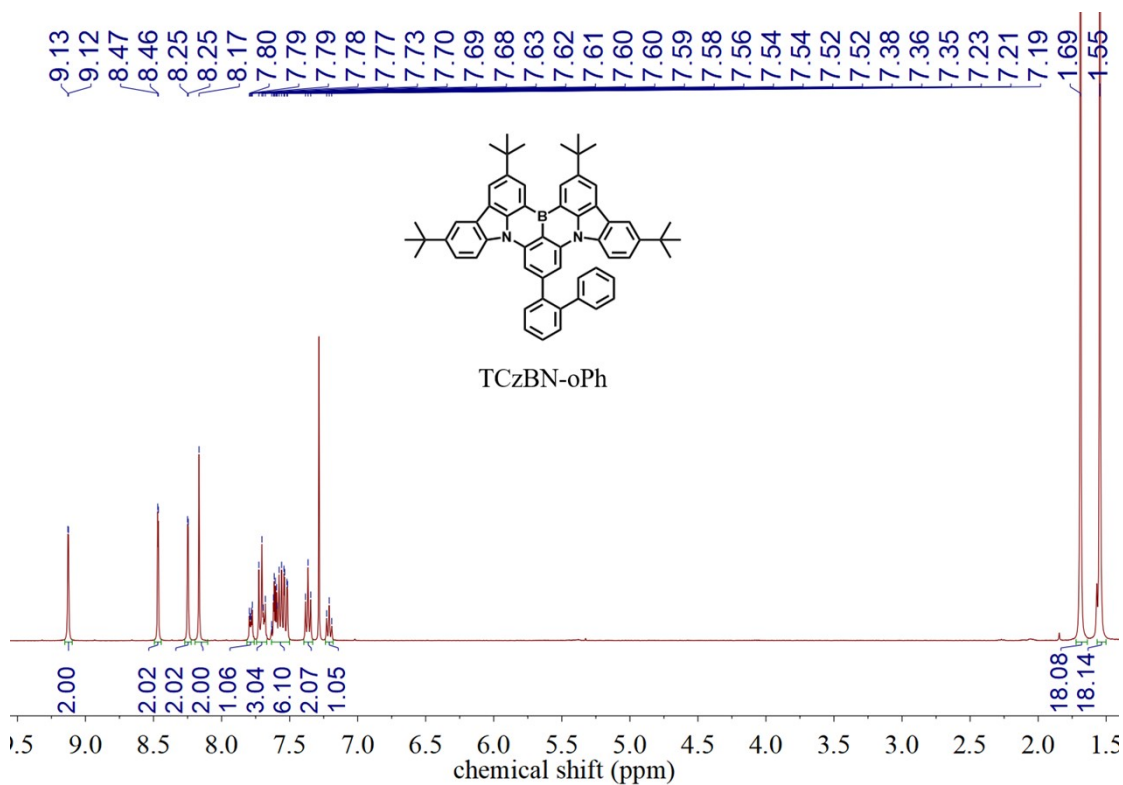

**Figure S15.** <sup>1</sup>H NMR spectrum of TCzBN-oPh in Chloroform-*d*.



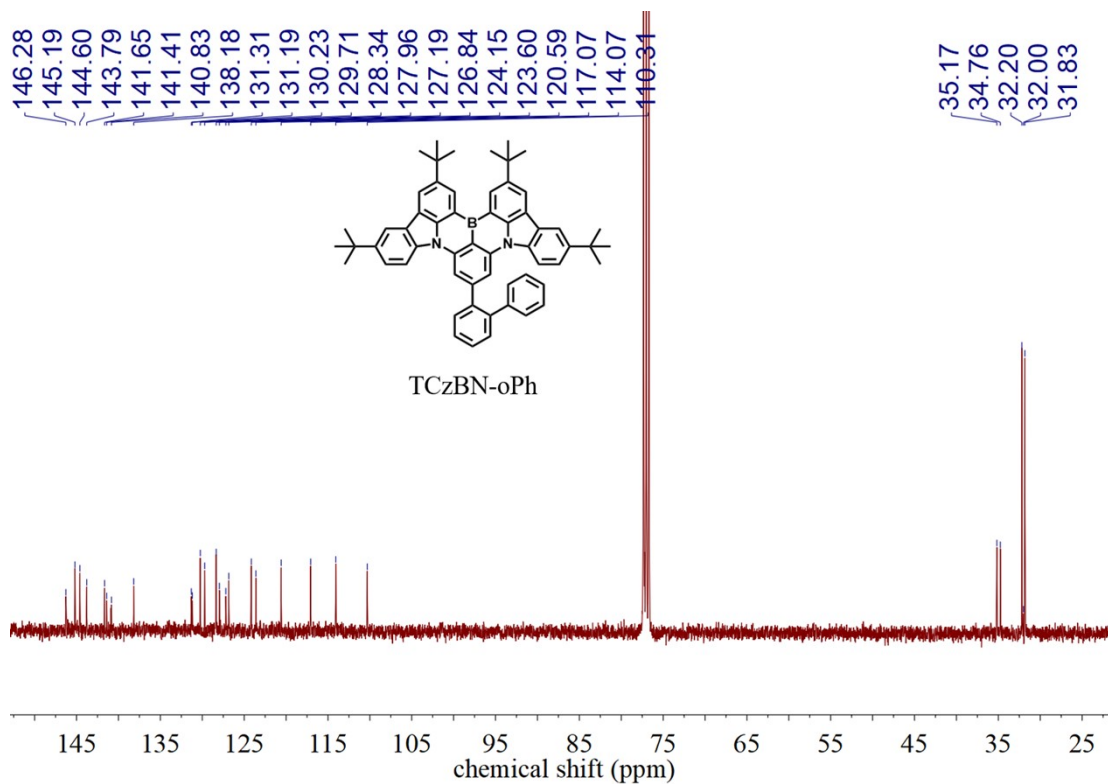

**Figure S16.** <sup>13</sup>C NMR spectrum of TCzBN-oPh in Chloroform-*d*.

## References

1. Y. Xu, Z. Cheng, Z. Li, B. Liang, J. Wang, J. Wei, Z. Zhang, Y. Wang, *Adv. Opt. Mater.* 2020, **8**, 1902142.
2. D. Kasemann, R. Brückner, H. Fröb, K. Leo, *Phys. Rev. B* 2011, **84**, 115208.
3. Y. Zhang, S. R. Forrest, *Phys. Rev. Lett.* 2012, **108**, 267404.
4. J. Lee, N. Aizawa, M. Numata, C. Adachi, T. Yasuda, *Adv. Mater.* 2017, **29**, 1604856.
5. D. Karthik, Y. H. Jung, H. Lee, S. Hwang, B. M. Seo, J. Y. Kim, C. W. Han, J. H. Kwon, *Adv. Mater.* 2021, **33**, 2007724.
